# Supplementary material
Source: Springer Nature journal article supplement (https://www.springermedizin.de/resource/supplementary/12960_2010_251_MOESM4_ESM.pdf/9570746)

Baseline: Current supply of doctors stratified by sex and age (2008)

Pass rate of national exam for medical doctors

Predictions: Future supply of doctors stratified by sex and age

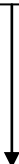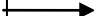

Supplement: MOESM4 [file 9570746]
